# Supplementary material
Source: Springer Nature journal article supplement (https://www.springermedizin.de/resource/supplementary/12884_2012_677_MOESM2_ESM.pdf/9458450)

## Colonial Relations

Disruption of economic resources,  
traditions, culture, families

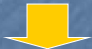

### Health Care System

Stigma, judgment, blame,  
racism, stereotyping

### Dismissive Practices

No Power  
No Choice  
No Control

Normalization  
Discrimination

Stressful  
Birth

Capacities  
Resources

Bring back  
the Celebration of Life

Respectful  
Relations

Dehumanizing  
Relations

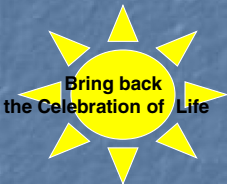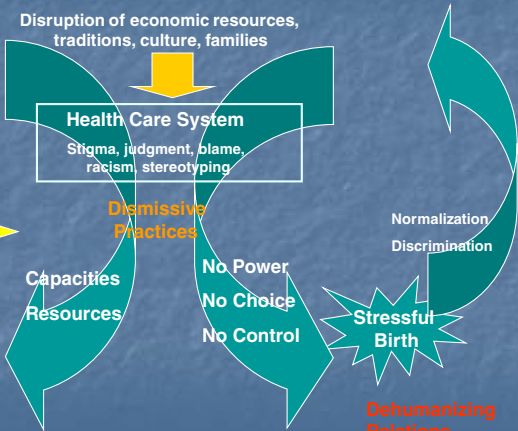

Supplement: MOESM2 [file 9458450]
